# Supplementary material
Source: PubMed Central journal article supplement (PMC8114545)
Supplement: advancesADV2021004665-suppl1.pdf [file advancesADV2021004665-suppl1.pdf]

## Supplementary Material

Supplementary Table 1: Search strategy

| Search Steps                                                                                                                                                                   |                                                                               | Search Fields               |                           |                           |
|--------------------------------------------------------------------------------------------------------------------------------------------------------------------------------|-------------------------------------------------------------------------------|-----------------------------|---------------------------|---------------------------|
|                                                                                                                                                                                |                                                                               | MEDLINE                     | EMBASE                    | Cochrane registry         |
| <b>1</b>                                                                                                                                                                       | "dose intensity" OR "dose reduction" OR "reduced dose" OR "miniCHOP"          | text words (including MeSH) | title, abstract, keywords | title, abstract, keywords |
| <b>2</b>                                                                                                                                                                       | "DLBCL" OR "diffuse large B cell lymphoma" OR "diffuse large B-cell lymphoma" | text words (including MeSH) | title, keywords           | title, abstract, keywords |
| <b>3</b>                                                                                                                                                                       | 1 AND 2                                                                       |                             |                           |                           |
| Abbreviations: miniCHOP: dose attenuated CHOP (cyclophosphamide, doxorubicin, vincristine, prednisolone); DLBCL: diffuse large B-cell lymphoma; MeSH: medical subject headings |                                                                               |                             |                           |                           |

Supplementary Table 2: CASP analysis of studies included in the analysis

| Reference                      | Did the study address a clearly focused issue? | Was the cohort recruited in an acceptable way? | Was the exposure accurately measured to minimize bias? | Was the outcome accurately measured to minimize bias? | Have the authors identified all important confounding factors? | Have they taken account of the confounding factors in the design and/or analysis? | Was the follow-up of subjects complete enough? | Was the follow-up of subjects long enough? | How precise are the results? | Do you believe in the results? | Can the results be applied to the local population? | Do the results of this study fit with other available evidence? | What are the implications of this study for practice? | Total score (/5) |
|--------------------------------|------------------------------------------------|------------------------------------------------|--------------------------------------------------------|-------------------------------------------------------|----------------------------------------------------------------|-----------------------------------------------------------------------------------|------------------------------------------------|--------------------------------------------|------------------------------|--------------------------------|-----------------------------------------------------|-----------------------------------------------------------------|-------------------------------------------------------|------------------|
| Terada <i>et al</i>            | Yes                                            | Yes                                            | Unsure                                                 | Unsure                                                | Yes                                                            | Yes                                                                               | Yes                                            | Yes                                        | Low                          | Unclear                        | Unclear                                             | Yes                                                             | Unclear                                               | 3                |
| Hirakawa <i>et al</i>          | Yes                                            | Yes                                            | Unsure                                                 | Unsure                                                | Unclear                                                        | Yes                                                                               | Yes                                            | Yes                                        | High                         | Yes                            | Yes                                                 | Yes                                                             | Unclear                                               | 4                |
| Carson <i>et al</i>            | Yes                                            | No                                             | Unsure                                                 | Unsure                                                | No                                                             | No                                                                                | No                                             | No                                         | Unclear                      | No                             | No                                                  | No                                                              | Unclear                                               | 1                |
| Ha <i>et al</i>                | Yes                                            | Yes                                            | Unsure                                                 | Unsure                                                | Yes                                                            | Yes                                                                               | No                                             | No                                         | Low                          | Yes                            | Yes                                                 | Unclear                                                         | Unclear                                               | 3                |
| Vidal <i>et al</i>             | Yes                                            | Yes                                            | Unsure                                                 | Unsure                                                | Unclear                                                        | Yes                                                                               | Yes                                            | Yes                                        | High                         | Yes                            | Unclear                                             | Yes                                                             | Unclear                                               | 4                |
| Juul <i>et al</i>              | No                                             | Yes                                            | Unsure                                                 | Unsure                                                | No                                                             | No                                                                                | Yes                                            | Yes                                        | Unclear                      | Yes                            | Yes                                                 | Yes                                                             | Unclear                                               | 3                |
| Morth <i>et al</i>             | No                                             | No                                             | Unsure                                                 | Unsure                                                | Yes                                                            | Yes                                                                               | Yes                                            | Yes                                        | High                         | Yes                            | Yes                                                 | Yes                                                             | Unclear                                               | 3                |
| Eyre <i>et al</i>              | Yes                                            | Yes                                            | Unsure                                                 | Unsure                                                | Yes                                                            | Yes                                                                               | Yes                                            | Yes                                        | High                         | Yes                            | Yes                                                 | Yes                                                             | Unclear                                               | 4                |
| Długosz - Danecka <i>et al</i> | Yes                                            | No                                             | Unclear                                                | Unclear                                               | No                                                             | No                                                                                | Yes                                            | Yes                                        | High                         | No                             | Unclear                                             | Yes                                                             | Unclear                                               | 3                |
| Nagata <i>et al</i>            | Yes                                            | Yes                                            | Unsure                                                 | Unsure                                                | No                                                             | No                                                                                | Yes                                            | Yes                                        | High                         | Unclear                        | Yes                                                 | Yes                                                             | Unclear                                               | 3                |
| Hwang <i>et al</i>             | Yes                                            | Yes                                            | Unsure                                                 | Unsure                                                | Unclear                                                        | Yes                                                                               | Yes                                            | Yes                                        | Low                          | Unclear                        | Unclear                                             | No                                                              | Unclear                                               | 3                |
| Lee <i>et al</i>               | Yes                                            | No                                             | Unsure                                                 | Unsure                                                | Unclear                                                        | Yes                                                                               | Yes                                            | Yes                                        | High                         | Unclear                        | No                                                  | Unclear                                                         | Unclear                                               | 3                |

|                       |     |     |        |        |     |     |     |     |      |     |     |     |         |   |
|-----------------------|-----|-----|--------|--------|-----|-----|-----|-----|------|-----|-----|-----|---------|---|
| Yamamoto <i>et al</i> | Yes | Yes | Unsure | Unsure | Yes | Yes | Yes | Yes | High | Yes | Yes | Yes | Unclear | 4 |
|-----------------------|-----|-----|--------|--------|-----|-----|-----|-----|------|-----|-----|-----|---------|---|

Supplementary Table 3: Overview of the studies in the elderly population age > 70, based on dose intensity and outcomes analysis

| Age group (years) | Papers       | RDI cut off | Univariable OS impact                                                                                   | Univariable PFS impact | Multivariable OS impact                                                                                                                                                                                                                                                                                                                                                                                                                              | Multivariable PFS impact | Adjustment performed for ECOG and comorbidity                                               | Cause-specific survival used for OS estimation |
|-------------------|--------------|-------------|---------------------------------------------------------------------------------------------------------|------------------------|------------------------------------------------------------------------------------------------------------------------------------------------------------------------------------------------------------------------------------------------------------------------------------------------------------------------------------------------------------------------------------------------------------------------------------------------------|--------------------------|---------------------------------------------------------------------------------------------|------------------------------------------------|
| ≥70               | Ha et al.    | 60%         | Pts ≥70 years only<br>RDI <60%:<br>HR 0.45, 95% CI (0.21-0.97),<br>p =0.04                              | Not done               | Pts ≥70 years only<br>RDI ≥60%: HR 1.597, 95% CI (0.607-4.202), p=0.343                                                                                                                                                                                                                                                                                                                                                                              | Not done                 | B symptoms, Stage ≥3, ECOG PS ≥2, LDH>ULN, EN sites ≥2, IPI ≥3, BM involvement, Bulky tumor | No                                             |
|                   | Vidal et al. | 90%         | Dose (cycle 1 [H], continuous variable), for every 10% increase: HR 0.80, p <0.0001, 95% CI (0.72-0.88) | Not done               | Calculated individually for Cycle 1 of [C], [H], and for cycles 1+2 for [C], [H]<br><br>-Dose[C] <sub>cycle 1</sub> (for every 10% dose increase): HR 0.77, 95% CI (0.64-0.92), p<0.005<br>-Dose[C] <sub>cycle 1+2</sub> (for every 10% dose increase): HR 0.76, 95% CI (0.60-0.96), p<0.019<br>-Dose[H] <sub>cycle 1</sub> (for every 10% dose increase): HR 0.81, 95% CI (0.70-0.94), p<0.005<br>-Dose[H] <sub>cycle 1+2</sub> (for every 10% dose | Not done                 | ECOG 0-1 vs. ≥2; age ≥80 years; gender; IPI, Hb, and albumin                                | No                                             |

|     |                                  |     |                                                                                                                 |                                                                                                                                         |                                                                                                                                                        |                                                                             |                                                                  |     |
|-----|----------------------------------|-----|-----------------------------------------------------------------------------------------------------------------|-----------------------------------------------------------------------------------------------------------------------------------------|--------------------------------------------------------------------------------------------------------------------------------------------------------|-----------------------------------------------------------------------------|------------------------------------------------------------------|-----|
|     |                                  |     |                                                                                                                 |                                                                                                                                         | increase): HR 0.82, 95% CI (0.69-0.97), p<0.019                                                                                                        |                                                                             |                                                                  |     |
|     | Eyre et al.                      | 80% | IDI ≥80%<br>OS: SHR 0.35, p<0.001, 95% CI (0.35-0.58)                                                           | IDI ≥80%<br>PFS: SHR 0.50, p<0.001, 95% CI (0.39-0.64)<br>CIR:<br>Age: 70-79 years<br>IDI<80%<br>SHR 1.80, p =0.004, 95% CI (1.21-2.67) |                                                                                                                                                        | CIR:<br>Age: 70-79 years<br>IDI<80%<br>SHR 1.61, p=0.04, 95% CI (1.02-2.53) | Age, stage, ECOG PS ≥2, LDH, albumin, gender, B-symptoms, EN>1,  | Yes |
| ≥75 | Juul et al.                      | 80% | Full dose ≥80%, KM analysis for OS<br>75-79 years: p = 0.068<br>80-84 years: p = 0.414<br>≥ 85 years: p = 0.962 | Not done                                                                                                                                | MVA for R ± CHOP/CHOEP (ref) vs. less intensive t/t<br>75-79 years: OS, HR 1.54, 95% CI (1.04-2.30)                                                    | Not done                                                                    | age, sex, IPI, CCI score                                         | No  |
| ≥80 | Eyre et al. (subgroup analysis)  | 80% | Not done                                                                                                        | CIR:<br>Age ≥80 years<br>IDI <80%<br>SHR: 1.40 95% CI (0.95-2.07), p=0.09                                                               | Not done                                                                                                                                               | CIR:<br>Age ≥80 years<br>IDI <80%<br>SHR: 1.48 95% CI (0.96-2.29), p=0.078  | Age, stage, ECOG PS ≥2, LDH, albumin, gender, B-symptoms, EN >1, | Yes |
|     | Juul et al. (subgroup analysis)  | 80% | Full dose ≥80%, KM analysis for OS<br>80-84 years: p = 0.414<br>≥ 85 years: p = 0.962                           | Not done                                                                                                                                | MVA for R ± CHOP/CHOEP (ref) vs. less intensive t/t<br><br>80-84 years: OS, HR 1.39, 95% CI (1.01-1.91)<br>≥ 85 years: OS, HR 1.04, 95% CI (0.69-1.58) | Not done                                                                    | age, sex, IPI, CCI score                                         | No  |
|     | Vidal et al. (subgroup analysis) | 90% | Not done for the subgroup of ≥ 80 years                                                                         | Not done                                                                                                                                | Delivered dose of [H] <90%: OS, HR 0.88, 95% CI (0.74-1.06), p = 0.16<br><br>Delivered dose of [C] <90%: OS, HR                                        | Not done                                                                    | Age, gender, IPI, Hb, albumin                                    | No  |

|  |               |     |                                                                                                                           |          |                                                       |          |                               |    |
|--|---------------|-----|---------------------------------------------------------------------------------------------------------------------------|----------|-------------------------------------------------------|----------|-------------------------------|----|
|  |               |     |                                                                                                                           |          | 0.87, 95% CI (0.72-1.06), p = 0.16                    |          |                               |    |
|  | Carson et al. | 85% | KM, and log-rank for OS comparison<br>1-yr OS rate: RDI ≥85% - 59%<br>RDI <85% - 70%; (Log-rank p=0.029), HR not provided | Not done | Not done                                              | Not done | Not done                      | No |
|  | Lee et al.    | 50% | KM analysis:<br>tARDI >50% vs. ≤50%<br>2yr OS = 61.8% vs. 50.8%, p=0.030                                                  | Not done | tARDI (/10%): HR 0.889, 95% CI (0.809-0.975), p=0.013 | Not done | albumin, CCI score, IPI score | No |

Abbreviations:

OS: Overall survival; PFS: Progression-free survival; MVA: multivariable analysis; UVA: univariable analysis

C: Cyclophosphamide; H: Doxorubicin; O: Vincristine; P: Prednisone; R: Rituximab; THP-ADM: tetrahydropyranlyadriamycin;

IPI – International prognostic index; CCI: Charlson Comorbidity Index; LDH: Lactate dehydrogenase; ULN: Upper limit of normal; EN: extranodal disease; PS: performance status

SHR: sub-hazard ratio

IDI – Intended dose intensity = Average delivered dose [C+H] in cycle 1, expressed as a % relative to the standard dose.

RDI - Relative Dose Intensity (varies by study design). See table 2 for details on the derivation of RDI.

tARDI: total average RDI used in Lee et al. Haematologica 2020

CIR: Cumulative Incidence of Relapse
